# Supplementary material for: The impact of treatment for childhood classical Hodgkin lymphoma according to the EuroNet-PHL-C2 protocol on serum anti-Müllerian Hormone
Source: PubMed Central journal article supplement — Hum Reprod. 2024 May 24;39(8):1701–11. doi: 10.1093/humrep/deae112 (PMC11291946; doi:10.1093/humrep/deae112), 2024-05-24
Supplement: deae112_supplementary_table_s1.pdf [file deae112_supplementary_table_s1.pdf]

**Supplementary Table S1.** Overview of unadjusted median and low (<0.5 µg/l) anti-Müllerian hormone (AMH) levels during treatment for childhood classical Hodgkin lymphoma and AMH recovery after 2 years.

| AMH (µg/l)                                         | Treatment level |                               |          |                   |          |                  |          |                  |                     |                  |                       |                  |
|----------------------------------------------------|-----------------|-------------------------------|----------|-------------------|----------|------------------|----------|------------------|---------------------|------------------|-----------------------|------------------|
|                                                    | N               | All patients*<br>Median (IQR) | TL1      |                   | TL2      |                  | TL3      |                  | TL2/3 COPDAC-28 arm |                  | TL2/3 DECOPDAC-21 arm |                  |
|                                                    |                 |                               | N        | Median (IQR)      | N        | Median (IQR)     | N        | Median (IQR)     | N                   | Median (IQR)     | N                     | Median (IQR)     |
| T0: at diagnosis                                   | 97              | 1.7 [0.9; 2.7]                | 18       | 1.9 [1.2; 2.9]    | 44       | 1.8 [1.0; 2.7]   | 35       | 1.5 [0.7; 2.6]   | 51                  | 1.6 [0.7; 2.5]   | 28                    | 1.8 [1.0; 3.2]   |
| T1: after 2× OEPA                                  | 100             | 0.06 [0.03; 0.1]              | 18       | 0.07 [0.03; 0.18] | 46       | 0.05 [0.03; 0.1] | 36       | 0.06 [0.03; 0.1] | 54                  | 0.06 [0.03; 0.1] | 28                    | 0.06 [0.03; 0.2] |
| T1b: after 1× COPDAC                               | 15              | 0.7 [0.3; 1.4]                | 15       | 0.7 [0.3; 1.4]    | 0        | —                | 0        | —                | 0                   | —                | 0                     | —                |
| T2: after 2× (DE)COPDAC                            | 76              | 0.4 [0.1; 1.0]                | 0        | —                 | 44       | 0.5 [0.2; 1.0]   | 32       | 0.2 [0.06; 0.8]  | 50                  | 0.6 [0.2; 1.7]   | 26                    | 0.1 [0.04; 0.3]  |
| T3: after 4× (DE)COPDAC                            | 29              | 0.5 [0.08; 2.1]               | 0        | —                 | 0        | —                | 29       | 0.5 [0.08; 2.1]  | 17                  | 0.9 [0.4; 3.0]   | 12                    | 0.08 [0.03; 0.6] |
| T4: 2 years post-diagnosis                         | 73              | 2.1 [1.0; 3.8]                | 15       | 2.8 [1.5; 4.3]    | 38       | 2.3 [1.1; 4.1]   | 20       | 1.3 [0.8; 2.1]   | 36                  | 2.1 [0.9; 3.8]   | 22                    | 1.8 [0.9; 3.7]   |
| T5: 5 years post-diagnosis<br>or age 18 years old. | 12              | 3.9 [2.1; 7.9]                | 2        | 6.5 [4.2; 8.8]    | 9        | 3.8 [1.5; 7.3]   | 1        | 2.8              | 5                   | 4.0 [1.9; 9.8]   | 5                     | 2.2 [1.2; 4.6]   |
| <b>AMH &lt;0.5 µg/l</b>                            | <b>N</b>        | <b>n (%)</b>                  | <b>N</b> | <b>n (%)</b>      | <b>N</b> | <b>n (%)</b>     | <b>N</b> | <b>n (%)</b>     | <b>N</b>            | <b>n (%)</b>     | <b>N</b>              | <b>n (%)</b>     |
| T0: at diagnosis                                   | 97              | 12 (12%)                      | 18       | 1 (6%)            | 44       | 6 (14%)          | 35       | 5 (14%)          | 51                  | 9 (18%)          | 28                    | 2 (7%)           |
| T1: after 2× OEPA                                  | 100             | 98 (98%)                      | 18       | 18 (100%)         | 46       | 45 (98%)         | 36       | 35 (97%)         | 54                  | 52 (96%)         | 28                    | 28 (100%)        |
| T1b: after 1× COPDAC                               | 15              | 7 (47%)                       | 15       | 7 (47%)           | 0        | —                | 0        | —                | 0                   | —                | 0                     | —                |
| T2: after 2× (DE)COPDAC                            | 76              | 42 (55%)                      | 0        | —                 | 44       | 21 (48%)         | 32       | 21 (66%)         | 50                  | 20 (40%)         | 26                    | 22 (85%)         |
| T3: after 4× (DE)COPDAC                            | 29              | 15 (52%)                      | 0        | —                 | 0        | —                | 29       | 15 (52%)         | 17                  | 6 (35%)          | 12                    | 9 (75%)          |
| T4: 2 years post-diagnosis                         | 73              | 5 (7%)                        | 15       | 0 (0%)            | 38       | 2 (5%)           | 20       | 3 (15%)          | 36                  | 3 (8%)           | 22                    | 2 (9%)           |
| T5: 5 years post-diagnosis<br>or age 18 years old. | 12              | 1 (8%)                        | 2        | 0 (0%)            | 9        | 1 (11%)          | 1        | 0 (0%)           | 5                   | 0 (0%)           | 5                     | 1 (20%)          |
| <b>AMH recovery compared<br/>to baseline</b>       | <b>N</b>        | <b>n (%)</b>                  | <b>N</b> | <b>n (%)</b>      | <b>N</b> | <b>n (%)</b>     | <b>N</b> | <b>n (%)</b>     | <b>N</b>            | <b>n (%)</b>     | <b>N</b>              | <b>n (%)</b>     |
| Reached baseline value                             | 68              | 46 (68%)                      | 15       | 12 (80%)          | 33       | 24 (73%)         | 20       | 10 (50%)         | 31                  | 23 (74%)         | 22                    | 11 (50%)         |

TL, treatment level; OEPA, vincristine, etoposide, prednisone, doxorubicin; COPDAC-28, cyclophosphamide, vincristine, prednisone and dacarbazine; DECOPDAC-21, doxorubicin, etoposide, cyclophosphamide, vincristine, prednisone and dacarbazine; N group total, n, number. Assigned treatment was according to the EuroNet-PHL-C2 protocol (see treatment-flow in [Supplementary Fig. S1](#)). TL1 patients receive 2× OEPA induction followed by either 1× COPDAC-28 or involved field radiotherapy. TL2/TL3 patients are randomized between the COPDAC-28 and DECOPDAC-21 treatment schemes and receive 2× OEPA induction followed by 2× (TL2) or 4× (TL3) (DE)COPDAC consolidation. Indication for radiotherapy depends on treatment response and treatment-group.

\* Samples drawn in patients after receiving pelvic radiotherapy (n = 4 T4 and n = 1 T5 samples) were excluded from the analyses. Recovery was assessed in cases where both T0 and T4 samples were available.
