# Supplementary material for: The impact of treatment for childhood classical Hodgkin lymphoma according to the EuroNet-PHL-C2 protocol on serum anti-Müllerian Hormone
Source: PubMed Central journal article supplement — Hum Reprod. 2024 May 24;39(8):1701–11. doi: 10.1093/humrep/deae112 (PMC11291946; doi:10.1093/humrep/deae112), 2024-05-24
Supplement: deae112_supplementary_table_s2.pdf [file deae112_supplementary_table_s2.pdf]

Supplementary Table S2. Menstrual cycle in girls treated for classical Hodgkin lymphoma.

|                                                  | All included girls (n = 104) | TL1 (n = 18)      | TL2/3 COPDAC-28 arm (n = 57) | TL2/3 DECOPDAC-21 arm (n = 29) | COPDAC-28 vs. DECOPDAC-21 (P-value) |
|--------------------------------------------------|------------------------------|-------------------|------------------------------|--------------------------------|-------------------------------------|
| <i>Menarchal status</i>                          |                              |                   |                              |                                |                                     |
| <b>Timing of menarche</b>                        |                              |                   |                              |                                |                                     |
| Before treatment, n (%)                          | 85/104 (82%)                 | 14/18 (78%)       | 49/57 (86%)                  | 22/29 (76%)                    | 0.39                                |
| Median age (IQR)                                 | 12.0 [12.0; 13.0]            | 13.5 [12.2; 14.0] | 12.0 [12.0; 13.0]            | 12.0 [12.0; 13.0]              | 0.31                                |
| During treatment, n%                             | 2/104 (2%)                   | 1/18 (6%)         | 0/57 (0%)                    | 1/29 (3%)                      | 0.34                                |
| Median age (IQR)                                 | 13.5 [13.2; 13.8]            | 13.0              | —                            | 14.0                           | —                                   |
| During follow-up, n%                             | 10/104 (10%)                 | 3/18 (17%)        | 5/57 (9%)                    | 2/29 (7%)                      | 1.000                               |
| Median age (IQR)                                 | 13.5 [12.0; 14.0]            | 12.0 [12.0; 12.5] | 14.0 [12.0; 14.0]            | 14.5 [14.2; 14.8]              | 0.31                                |
| No Menarche up to last checkup                   | 7/104 (7%)                   | 0/18 (0%)         | 3/57 (5%)                    | 4/29 (14%)                     | 0.22                                |
| Median age at last checkup (IQR)                 | 13.8 [10.9; 14.2]            | —                 | 14.1 [11.6; 14.7]            | 12.5 [11.0; 13.9]              | 0.72                                |
| <i>Hormonal co-treatment</i>                     |                              |                   |                              |                                |                                     |
| <b>Uses hormonal contraceptives</b>              |                              |                   |                              |                                |                                     |
| At diagnosis                                     | 26/85 (31%)                  | 3/14 (21%)        | 17/49 (35%)                  | 6/22 (27%)                     | 0.52                                |
| During treatment                                 | 38/87 (44%)                  | 7/15 (47%)        | 25/49 (45%)                  | 6/23 (26%)                     | 0.06                                |
| At 2yPD checkup                                  | 34/97 (35%)                  | 7/18 (39%)        | 19/54 (35%)                  | 8/25 (32%)                     | 0.77                                |
| <b>GnRH-analogues during treatment</b>           |                              |                   |                              |                                |                                     |
|                                                  | 17/87 (20%)                  | 3/15 (20%)        | 9/49 (18%)                   | 5/22 (23%)                     | 1.000                               |
| <i>Menstrual cycle characteristics</i>           |                              |                   |                              |                                |                                     |
| <b>Treatment induced amenorrhea</b>              | 19//35 (54%)                 | 3/5 (60%)         | 10/17 (59%)                  | 6/14 (43%)                     | 0.75                                |
| <b>Menstrual cycle at 2 years post-diagnosis</b> |                              |                   |                              |                                |                                     |
| Regular                                          | 33                           | 8                 | 16                           | 9                              | 0.43                                |
| Irregular                                        | 14                           | 3                 | 7                            | 4                              |                                     |
| Amenorrhea                                       | 2                            | —                 | 1                            | 1                              |                                     |
| Hormonal contraceptives                          | 34                           | 7                 | 19                           | 8                              |                                     |
| No menarche                                      | 6                            | —                 | 2                            | 4                              |                                     |
| Unknown                                          | 15                           | —                 | 12                           | 3                              |                                     |

TL1 patients receive 2× OEPA induction followed by either 1× COPDAC-28 or involved node radiotherapy. TL2/TL3 patients are randomized between a COPDAC-28 and DECOPDAC-21 arm and receive 2× OEPA induction followed by 2× (TL2) or 4× (TL3) (DE)COPDAC consolidation. Indication and field of radiotherapy depends on treatment-arm and treatment response, see treatment flowchart in [Supplementary Fig. S1](#).

OEPA, vincristine, etoposide, prednisone, doxorubicin; COPDAC-28, cyclophosphamide, vincristine, prednisone, and dacarbazine; DECOPDAC-21, doxorubicin, etoposide, cyclophosphamide, vincristine, prednisone, and dacarbazine. IQR, interquartile range; 2yPD, 2 years post diagnosis; TL, treatment level.

Reported percentages of girls taking hormonal contraceptives and GnRH-analogues were calculated in postmenarchal girls. Regularity of the menstrual cycle during follow-up was self-reported. Percentages of girls with treatment-induced amenorrhea were calculated in postmenarchal girls, not taking hormonal contraceptives or GnRH-analogues during treatment. P values were calculated by Mann-Whitney U test (continuous) or Chi-square/Fishers exact (categorical). A total of five girls received pelvic radiotherapy as part of their cHL treatment. At 2 years post-diagnosis, the menstrual cycle was regular in two girls, irregular in one girl, one girl used hormonal contraceptives during checkup and cycle data were missing in one girl.
